# Supplementary material
Source: Springer Nature journal article supplement (https://www.springermedizin.de/resource/supplementary/12936_2004_117_MOESM4_ESM.pdf/9546924)
Supplement: MOESM4 [file 9546924]

| <b>Outcome</b>                       | <b>Prevalence<br/>(n, %)</b> | <b>OR</b> | <b>SD</b> | <b>P</b> | <b>[95% Conf.<br/>Interval]</b> |       |
|--------------------------------------|------------------------------|-----------|-----------|----------|---------------------------------|-------|
| <b>Cerebral malaria</b>              | [142, 24%]                   | 3.61      | 1.24      | 0.000    | 1.83                            | 7.10  |
| <b>Severe anaemia</b>                | [395, 60%]                   | 0.63      | 0.21      | 0.174    | 0.32                            | 1.22  |
| <b>Hypoglycaemia</b>                 | [33, 6%]                     | 4.00      | 1.74      | 0.001    | 1.70                            | 9.41  |
| <b>Hyperlactataemia</b>              | [73, 15%]                    | 6.98      | 2.43      | 0.0001   | 3.52                            | 13.82 |
| <b>Respiratory distress syndrome</b> | [181, 31%]                   | 2.04      | 0.68      | 0.033    | 1.05                            | 3.94  |
